# Supplementary material for: Identification of a serum biomarker panel for the differential diagnosis of cholangiocarcinoma and primary sclerosing cholangitis
Source: PubMed Central journal article supplement (PMC5915126; doi:10.18632/oncotarget.24732), 2018-04-03
Supplement: oncotarget-09-17430-s001.pdf [file oncotarget-09-17430-s001.pdf]

# Identification of a serum biomarker panel for the differential diagnosis of cholangiocarcinoma and primary sclerosing cholangitis

## SUPPLEMENTARY MATERIALS

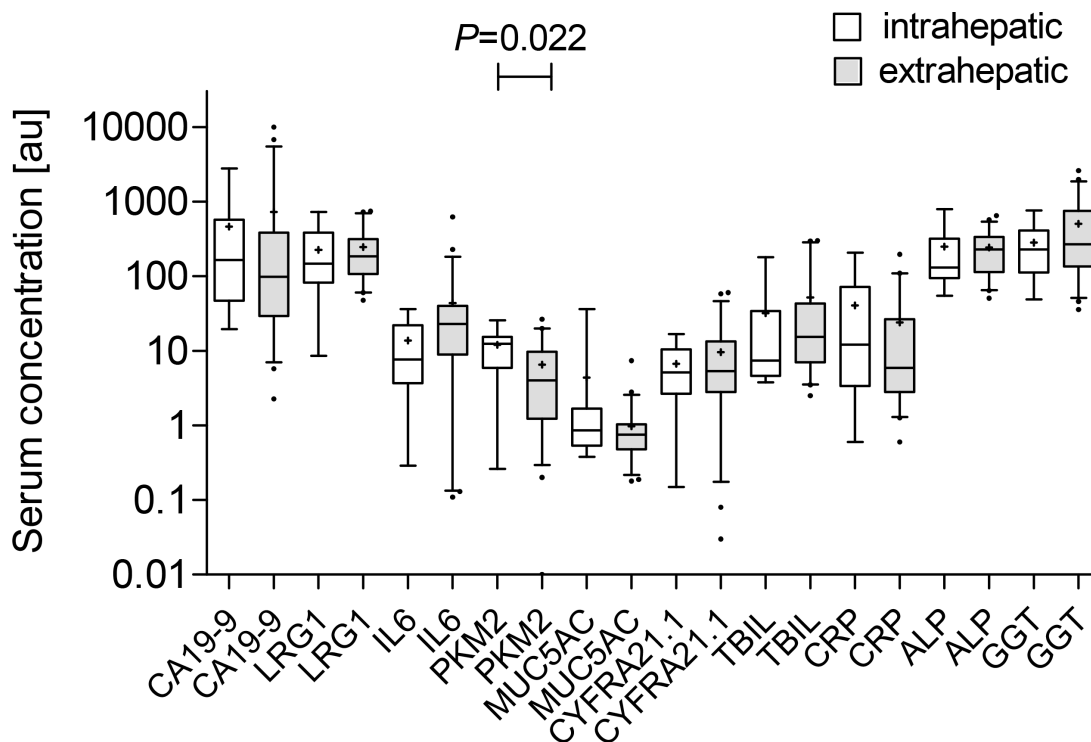

Supplementary Figure 1: Serum biomarker levels in CCA cases by tumour location: intrahepatic (*n* = 12) versus extrahepatic (perihilar, distal and overlapping; *n* = 46).

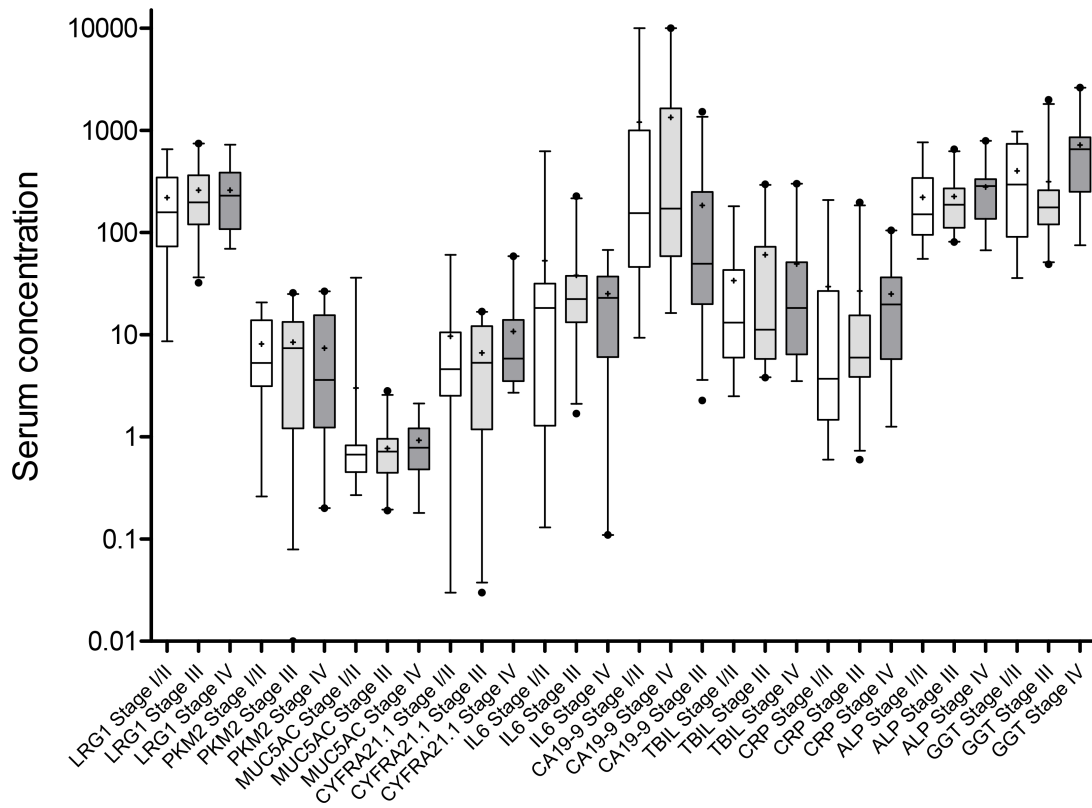

Supplementary Figure 2: Serum biomarker levels in CCA cases by TNM stage (stage I/II ( $n = 16$ ), stage III ( $N = 22$ ) and stage IV ( $n = 19$ )).

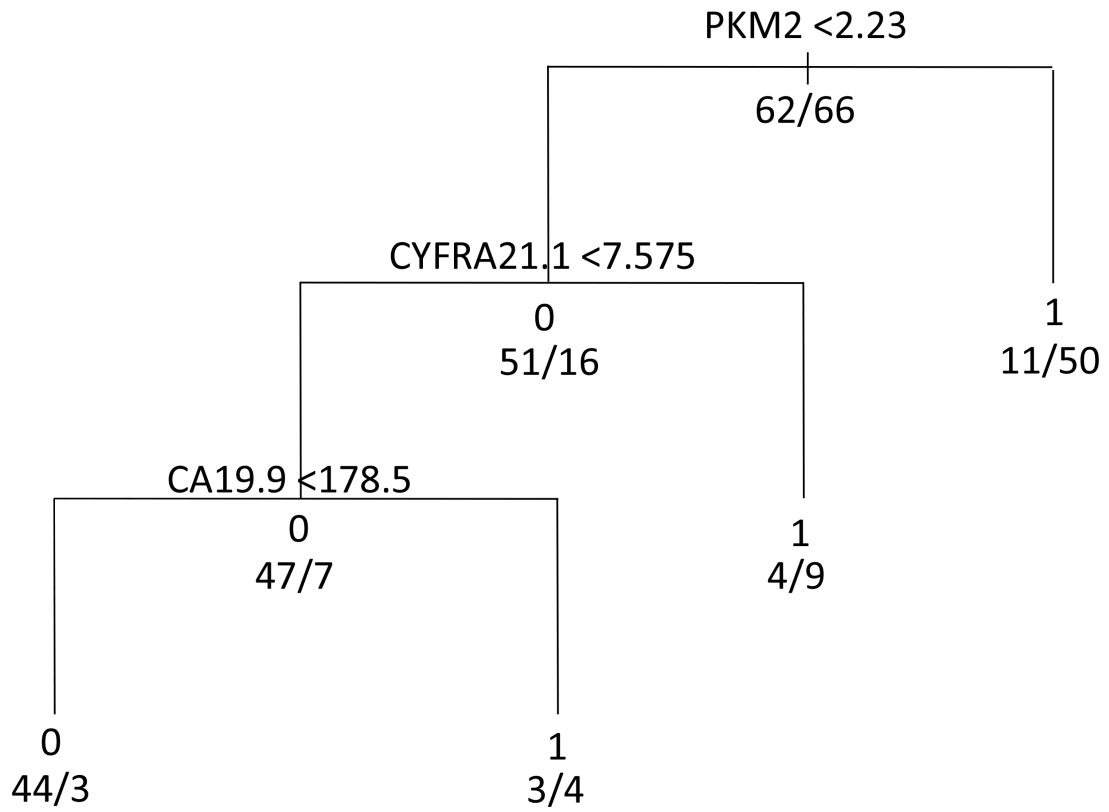

Supplementary Figure 3: Classification tree for discrimination of CCA and PSC.

**Supplementary Table 1: Biomarker model performance in CCA and PSC cases stratified by low TBIL (< 12.7 µmol/L; CCA n = 31; PSC n = 32) and high TBIL (> 12.7 µmol/L; CCA n = 35; PSC n = 30)**

| Model                   | TBIL low (< 12.7 µmol/L) |             |       | TBIL high (> 12.7 µmol/L) |             |       | Difference in sensitivity |
|-------------------------|--------------------------|-------------|-------|---------------------------|-------------|-------|---------------------------|
|                         | Sensitivity              | Specificity | AUC   | Sensitivity               | Specificity | AUC   |                           |
| PKM2, MUC5AC, CYFRA21.1 | 0.871                    | 0.9         | 0.918 | 0.657                     | 0.9         | 0.89  | -0.214                    |
| PKM2, CYFRA21.1, GGT    | 0.871                    | 0.9         | 0.902 | 0.743                     | 0.9         | 0.875 | -0.128                    |
| PKM2, CYFRA21.1, CRP    | 0.871                    | 0.9         | 0.901 | 0.743                     | 0.9         | 0.884 | -0.128                    |
| LRG1, PKM2, CYFRA21.1   | 0.871                    | 0.9         | 0.899 | 0.6                       | 0.9         | 0.845 | -0.271                    |
| PKM2, CYFRA21.1         | 0.871                    | 0.9         | 0.899 | 0.6                       | 0.9         | 0.842 | -0.271                    |
| PKM2, CYFRA21.1, CA19.9 | 0.839                    | 0.9         | 0.902 | 0.571                     | 0.9         | 0.839 | -0.268                    |
| PKM2, TBIL              | 0.806                    | 0.9         | 0.883 | 0.6                       | 0.9         | 0.829 | -0.206                    |
| PKM2, TBIL, CRP         | 0.806                    | 0.9         | 0.883 | 0.714                     | 0.9         | 0.869 | -0.092                    |
| PKM2, CA19.9, TBIL      | 0.806                    | 0.9         | 0.878 | 0.571                     | 0.9         | 0.827 | -0.235                    |
| PKM2, CA19.9, CRP       | 0.774                    | 0.9         | 0.887 | 0.686                     | 0.9         | 0.854 | -0.088                    |
| PKM2, CA19.9, GGT       | 0.774                    | 0.9         | 0.885 | 0.714                     | 0.9         | 0.874 | -0.06                     |
| PKM2, CA19.9            | 0.774                    | 0.9         | 0.879 | 0.571                     | 0.9         | 0.823 | -0.203                    |
| PKM2, ALP, GGT          | 0.774                    | 0.9         | 0.876 | 0.714                     | 0.9         | 0.871 | -0.06                     |
| PKM2, CRP               | 0.774                    | 0.9         | 0.873 | 0.714                     | 0.9         | 0.865 | -0.06                     |
| PKM2                    | 0.774                    | 0.9         | 0.872 | 0.571                     | 0.9         | 0.823 | -0.203                    |
| PKM2, CRP, ALP          | 0.774                    | 0.9         | 0.869 | 0.743                     | 0.9         | 0.871 | -0.031                    |
| PKM2, MUC5AC, IL6       | 0.742                    | 0.9         | 0.907 | 0.657                     | 0.9         | 0.867 | -0.085                    |
| PKM2, MUC5AC, ALP       | 0.71                     | 0.9         | 0.925 | 0.629                     | 0.9         | 0.861 | -0.081                    |
| PKM2, MUC5AC, CRP       | 0.71                     | 0.9         | 0.904 | 0.743                     | 0.9         | 0.901 | 0.033                     |
| PKM2, CRP, GGT          | 0.71                     | 0.9         | 0.88  | 0.686                     | 0.9         | 0.888 | -0.024                    |
| PKM2, GGT               | 0.71                     | 0.9         | 0.88  | 0.743                     | 0.9         | 0.881 | 0.033                     |
| LRG1, PKM2, GGT         | 0.71                     | 0.9         | 0.875 | 0.714                     | 0.9         | 0.883 | 0.004                     |
| PKM2, TBIL, GGT         | 0.71                     | 0.9         | 0.875 | 0.743                     | 0.9         | 0.879 | 0.033                     |
| MUC5AC, CYFRA21.1, CRP  | 0.71                     | 0.9         | 0.814 | 0.371                     | 0.9         | 0.808 | -0.339                    |
| MUC5AC, CYFRA21.1       | 0.71                     | 0.9         | 0.785 | 0.286                     | 0.9         | 0.776 | -0.424                    |
| PKM2, MUC5AC, CA19.9    | 0.677                    | 0.9         | 0.913 | 0.6                       | 0.9         | 0.858 | -0.077                    |
| PKM2, MUC5AC            | 0.645                    | 0.9         | 0.91  | 0.657                     | 0.9         | 0.862 | 0.012                     |
| PKM2, MUC5AC, GGT       | 0.645                    | 0.9         | 0.91  | 0.714                     | 0.9         | 0.887 | 0.069                     |
| LRG1, PKM2, MUC5AC      | 0.613                    | 0.9         | 0.913 | 0.657                     | 0.9         | 0.861 | 0.044                     |
| PKM2, MUC5AC, TBIL      | 0.613                    | 0.9         | 0.907 | 0.657                     | 0.9         | 0.862 | 0.044                     |
| CYFRA21.1, GGT          | 0.613                    | 0.9         | 0.777 | 0.171                     | 0.9         | 0.689 | -0.442                    |
| CYFRA21.1, CRP          | 0.581                    | 0.9         | 0.793 | 0.343                     | 0.9         | 0.702 | -0.238                    |
| CYFRA21.1, CA19.9       | 0.581                    | 0.9         | 0.782 | 0.143                     | 0.9         | 0.748 | -0.438                    |
| CYFRA21.1               | 0.581                    | 0.9         | 0.78  | 0.257                     | 0.9         | 0.691 | -0.324                    |
| LRG1, CYFRA21.1         | 0.581                    | 0.9         | 0.78  | 0.257                     | 0.9         | 0.695 | -0.324                    |
| CA19.9                  | 0.419                    | 0.9         | 0.749 | 0.543                     | 0.9         | 0.825 | 0.124                     |
| MUC5AC, IL6             | 0.355                    | 0.9         | 0.727 | 0.343                     | 0.9         | 0.736 | -0.012                    |
| MUC5AC, CA19.9          | 0.355                    | 0.9         | 0.705 | 0.257                     | 0.9         | 0.741 | -0.098                    |
| CA19.9, CRP             | 0.355                    | 0.9         | 0.6   | 0.257                     | 0.9         | 0.716 | -0.098                    |
| MUC5AC                  | 0.323                    | 0.9         | 0.701 | 0.229                     | 0.9         | 0.743 | -0.094                    |
| MUC5AC, TBIL            | 0.323                    | 0.9         | 0.699 | 0.314                     | 0.9         | 0.74  | -0.009                    |
| MUC5AC, CRP             | 0.29                     | 0.9         | 0.71  | 0.371                     | 0.9         | 0.783 | 0.081                     |
| LRG1, CA19.9            | 0.258                    | 0.9         | 0.626 | 0.543                     | 0.9         | 0.821 | 0.285                     |
| LRG1, CRP               | 0.194                    | 0.9         | 0.599 | 0.343                     | 0.9         | 0.668 | 0.149                     |
| TBIL, GGT               | 0.129                    | 0.9         | 0.542 | 0.143                     | 0.9         | 0.683 | 0.014                     |
| TBIL                    | 0.129                    | 0.9         | 0.537 | 0.086                     | 0.9         | 0.668 | -0.043                    |
| TBIL, CRP               | 0.097                    | 0.9         | 0.534 | 0.314                     | 0.9         | 0.674 | 0.217                     |
| CRP                     | 0.032                    | 0.9         | 0.47  | 0.314                     | 0.9         | 0.679 | 0.282                     |

A selection of 48 of the 105 models generated (up to 3 markers) are shown to highlight the effect of TBIL on performance.

**Supplementary Table 2: Biomarker levels in pre-diagnosis samples and cancer-free controls**

| <b>Marker</b>        | <b>Biliary tract cancer (<i>n</i> = 89)</b> | <b>Control (<i>n</i> = 91)</b> | <b><i>P</i> value</b> |
|----------------------|---------------------------------------------|--------------------------------|-----------------------|
| TBIL (μmol/L)        | 4.6 (1.9–20.9)                              | 4.7 (1.7–21.8)                 | 0.916                 |
| CRP (mg/L)           | 3.1 (0.6–71.9)                              | 1.9 (0.6–54.0)                 | 0.0007                |
| ALP (U/L)            | 83 (29–844)                                 | 73 (29–151)                    | 0.006                 |
| GGT (U/L)            | 17 (0.6–2566)                               | 12 (0.6–234)                   | 0.039                 |
| CA19–9 (U/mL)        | 12.2 (1.0–1283)                             | 8.4 (1.0–73.3)                 | 0.002                 |
| CA19–9 > 37 U/mL (%) | 15/89 (17%)                                 | 6/91 (7%)                      | 0.038*                |
| LRG1 (μg/mL)         | 139.2 (7.56–546.9)                          | 62.78 (0.45–836.4)             | 0.362                 |
| IL6 (ng/mL)          | 16.78 (1.0–1600)                            | 15.37 (1.0–1600)               | 0.240                 |
| PKM2 (ng/mL)         | 2.46 (0.66–43.03)                           | 2.27 (0.32–7.53)               | 0.628                 |

Median values (range) are given. *P* values determined using the Mann Whitney *U* test or Fisher's exact test\*.
